# Supplementary material
Source: Elsevier journal article supplement (https://www.sciencedirect.com/science/article/pii/S0211699519300876)
Supplement: mmc1 [file S0211699519300876:mmc1.docx]

**ANEXO 1.** **Carta de invitación al paciente al programa de *Mentoring.***

Estimado/a _________________

Queremos informarte que estamos organizando unas reuniones con personas que tienen insuficiencia renal crónica dirigidas por personas que también la padecen.

El objetivo que se busca es compartir, apoyarnos mutuamente y encontrar formas o maneras de hacer más fácil lo difícil. Son reuniones voluntarias y están dirigidas tanto a pacientes como a cuidadores/as que comparten la carga.

Serán tres sesiones de una hora y media aproximadamente, en grupos de 5-7 personas, en la que hablaremos de aquellos aspectos que nos puede ayudar para aprender a convivir con este problema. Lo ideal es hacerlo en tres semanas consecutivas pero puede adaptarse según necesidades.

Creemos que el apoyo entre iguales puede ser de ayuda para entenderse mejor, normalizar y coger fuerzas ante la Enfermedad Renal.

Si estás interesado en participar rellena la tabla adjunta poniendo preferencias de mañana o tarde y puedes comentárselo a la enfermera / supervisor / nefrólogo: ………………….. y te informaremos de las fechas, horario y lugar de realización cuando estén hechos los grupos.

Marca con x la situación y preferencia:

| Hospital |  | |
| --- | --- | --- |
| Nombre y apellidos |  | |
| Preferencia | Mañana |  |
| Tarde |  |
| Situación de la ERC | Consulta ERCA |  |
| Hemodiálisis |  |
| Diálisis peritoneal |  |
| Trasplante |  |
| Cuidador/Acompañante |  |
